# Supplementary material for: CRISPR/Cas9 ADCY7 Knockout Stimulates the Insulin Secretion Pathway Leading to Excessive Insulin Secretion
Source: Front Endocrinol (Lausanne). 2021 Jun 11;12:657873. doi: 10.3389/fendo.2021.657873 (PMC8231291; doi:10.3389/fendo.2021.657873)
Supplement: Supplementary file 1 [file Table_1.xlsx]

## Sheet: Sheet2
Sample	Target	CT (Mean)	CT (Std Dev)	ΔCT	ΔCT(Mean)	SD(Mean)	ΔΔCT	RQ
Adcy7-1-2mm	Ins1	21.3905	0.0300055	-0.409721	-0.3978	0.0308892	-8.503	362.793
Adcy7-2-2mm	Ins1	21.2973	0.0387755	-0.386982
Adcy7-3-2mm	Ins1	21.322	0.0238864	-0.396698
Adcy7-1-10mm	Ins1	21.2851	0.041476	-0.218527	-0.17481	0.0675822	-8.32613	320.934
Adcy7-2-10mm	Ins1	21.3169	0.0467709	-0.189379
Adcy7-3-10mm	Ins1	21.4216	0.1145	-0.116524
Control 1-2mm	Ins1	29.9446	0.0483332	8.24209	8.1052	0.0781659	0	1
Control 2-2mm	Ins1	29.4686	0.0959664	8.00066
Control 3-2mm	Ins1	29.5248	0.0901982	8.07286
Control 1-10mm	Ins1	29.658	0.0671945	8.1683	8.15132	0.0652173	0	1
Control 2-10mm	Ins1	29.4946	0.0515125	8.08408
Control 3-10mm	Ins1	29.7029	0.0769448	8.2016
Adcy7-1-2mm	Ins2	29.1492	0.0667835	7.34891	7.3577	0.122828	-5.44593	43.5903
Adcy7-2-2mm	Ins2	29.1073	0.0984489	7.42301
Adcy7-3-2mm	Ins2	29.0199	0.203252	7.30117
Adcy7-1-10mm	Ins2	28.9713	0.0156653	7.46765	7.7096	0.0684086	-5.08977	34.0544
Adcy7-2-10mm	Ins2	29.1723	0.141649	7.66602
Adcy7-3-10mm	Ins2	29.5332	0.0479112	7.99512
Control 1-2mm	Ins2	34.9764	0.885542	13.2739	12.8036	0.963662	0	1
Control 2-2mm	Ins2	34.0884	0.551083	12.6205
Control 3-2mm	Ins2	33.9684	1.45436	12.5165
Control 1-10mm	Ins2	33.8548	0.746289	12.3651	12.7994	1.25813	0	1
Control 2-10mm	Ins2	34.331	1.23881	12.9206
Control 3-10mm	Ins2	34.6137	1.7893	13.1125
Adcy7-1-2mm	Gck	27.7415	0.0428286	5.94129	5.9423	0.0895681	-1.72893	3.31483
Adcy7-2-2mm	Gck	27.5471	0.037262	5.86281
Adcy7-3-2mm	Gck	27.7415	0.188614	6.02282
Adcy7-1-10mm	Gck	27.7638	0.121772	6.26014	6.23248	0.0839158	-1.63344	3.10251
Adcy7-2-10mm	Gck	27.5704	0.0480029	6.06409
Adcy7-3-10mm	Gck	27.9113	0.0819722	6.3732
Control 1-2mm	Gck	29.3379	0.216801	7.63543	7.67124	0.156911	0	1
Control 2-2mm	Gck	29.1608	0.0966955	7.69292
Control 3-2mm	Gck	29.1373	0.157235	7.68536
Control 1-10mm	Gck	29.1594	0.192404	7.66975	7.86591	0.124341	0	1
Control 2-10mm	Gck	29.2861	0.141155	7.87559
Control 3-10mm	Gck	29.5537	0.0394655	8.0524
Adcy7-1-2mm	Pdx1	23.9232	0.267724	2.12297	2.0409	0.109418	-0.763641	1.69777
Adcy7-2-2mm	Pdx1	23.7065	0.0419497	2.02226
Adcy7-3-2mm	Pdx1	23.6962	0.0185791	1.97748
Adcy7-1-10mm	Pdx1	23.5953	0.0335918	2.09163	2.19324	0.122845	-0.789033	1.72792
Adcy7-2-10mm	Pdx1	23.5947	0.080497	2.08843
Adcy7-3-10mm	Pdx1	23.9377	0.254446	2.39964
Control 1-2mm	Pdx1	24.3811	0.0739257	2.67857	2.80454	0.052766	0	1
Control 2-2mm	Pdx1	24.3137	0.0400727	2.84582
Control 3-2mm	Pdx1	24.3411	0.0442995	2.88924
Control 1-10mm	Pdx1	24.4211	0.0447451	2.93141	2.98227	0.0655395	0	1
Control 2-10mm	Pdx1	24.3503	0.127742	2.93981
Control 3-10mm	Pdx1	24.5769	0.0241313	3.07559
Adcy7-1-2mm	Pkaca	26.9083	0.0418472	5.10804	5.06071	0.0378789	-0.0279986	1.0196
Adcy7-2-2mm	Pkaca	26.6814	0.038088	4.99717
Adcy7-3-2mm	Pkaca	26.7956	0.0337016	5.0769
Adcy7-1-10mm	Pkaca	26.6644	0.0531529	5.16077	5.21534	0.0884385	0.0961431	0.935531
Adcy7-2-10mm	Pkaca	26.6542	0.113699	5.1479
Adcy7-3-10mm	Pkaca	26.8754	0.0984634	5.33735
Control 1-2mm	Pkaca	26.8534	0.0516686	5.15091	5.08871	0.0306119	0	1
Control 2-2mm	Pkaca	26.5419	0.0306052	5.07401
Control 3-2mm	Pkaca	26.4931	0.00956178	5.04119
Control 1-10mm	Pkaca	26.5551	0.0833366	5.06542	5.11919	0.0706895	0	1
Control 2-10mm	Pkaca	26.6043	0.0235921	5.19381
Control 3-10mm	Pkaca	26.5996	0.10514	5.09835
Adcy7-1-2mm	Pkacb	25.8695	0.0868183	4.06923	4.01359	0.103561	-0.0968787	1.06946
Adcy7-2-2mm	Pkacb	25.634	0.0350698	3.94979
Adcy7-3-2mm	Pkacb	25.7405	0.188796	4.02176
Adcy7-1-10mm	Pkacb	25.6647	0.0518809	4.16104	4.24142	0.0326631	-0.00659625	1.00458
Adcy7-2-10mm	Pkacb	25.6216	0.0190347	4.11528
Adcy7-3-10mm	Pkacb	25.986	0.0270736	4.44794
Control 1-2mm	Pkacb	25.7881	0.0624197	4.08561	4.11047	0.0415663	0	1
Control 2-2mm	Pkacb	25.6028	0.0304263	4.13492
Control 3-2mm	Pkacb	25.5628	0.0318529	4.11089
Control 1-10mm	Pkacb	25.6575	0.0874666	4.16781	4.24802	0.0574928	0	1
Control 2-10mm	Pkacb	25.6827	0.0382125	4.27225
Control 3-10mm	Pkacb	25.8053	0.0467991	4.304
Adcy7-1-2mm	Rapgel4	30.924	0.099854	9.12378	9.04813	0.11655	0.166262	0.891149
Adcy7-2-2mm	Rapgel4	30.6281	0.0816612	8.94389
Adcy7-3-2mm	Rapgel4	30.7954	0.168133	9.07672
Adcy7-1-10mm	Rapgel4	30.5845	0.0771254	9.08088	9.15357	0.0658864	0.233329	0.85067
Adcy7-2-10mm	Rapgel4	30.657	0.068621	9.15067
Adcy7-3-10mm	Rapgel4	30.7672	0.0519126	9.22915
Control 1-2mm	Rapgel4	30.4822	0.102609	8.77969	8.88187	0.0653449	0	1
Control 2-2mm	Rapgel4	30.3992	0.0234312	8.93128
Control 3-2mm	Rapgel4	30.3865	0.0699942	8.93464
Control 1-10mm	Rapgel4	30.3546	0.0124476	8.86489	8.92024	0.0583573	0	1
Control 2-10mm	Rapgel4	30.3798	0.123597	8.96937
Control 3-10mm	Rapgel4	30.4277	0.039027	8.92646
Adcy7-1-2mm	Foxa2	26.7033	0.0797711	4.90306	4.78229	0.0594783	-0.302771	1.23351
Adcy7-2-2mm	Foxa2	26.4058	0.0461385	4.72157
Adcy7-3-2mm	Foxa2	26.441	0.0525253	4.72225
Adcy7-1-10mm	Foxa2	26.4259	0.0129287	4.92229	4.97669	0.0368041	-0.371283	1.2935
Adcy7-2-10mm	Foxa2	26.3644	0.0593561	4.85815
Adcy7-3-10mm	Foxa2	26.6877	0.0381274	5.14962
Control 1-2mm	Foxa2	26.7215	0.0439799	5.01903	5.08506	0.0452106	0	1
Control 2-2mm	Foxa2	26.6055	0.048334	5.13758
Control 3-2mm	Foxa2	26.5505	0.0433178	5.09858
Control 1-10mm	Foxa2	26.6127	0.171269	5.12302	5.34797	0.162713	0	1
Control 2-10mm	Foxa2	26.7018	0.0323678	5.29131
Control 3-10mm	Foxa2	27.1309	0.284501	5.62959
Adcy7-1-2mm	Adcy7	35.3921	0.780601	13.5918	13.6881	0.842794	4.02125	0.0615861
Adcy7-2-2mm	Adcy7	35.2887	0.640101	13.6044
Adcy7-3-2mm	Adcy7	35.5867	1.10768	13.868
Adcy7-1-10mm	Adcy7	35.4374	1.00381	13.9338	13.3111	0.524654	3.5916	0.082951
Adcy7-2-10mm	Adcy7	34.3239	0.0886275	12.8176
Adcy7-3-10mm	Adcy7	34.7201	0.481529	13.182
Control 1-2mm	Adcy7	31.2648	0.159849	9.56231	9.66681	0.153173	0	1
Control 2-2mm	Adcy7	31.2514	0.205319	9.7835
Control 3-2mm	Adcy7	31.1065	0.0943515	9.65463
Control 1-10mm	Adcy7	31.0913	0.285318	9.60161	9.71953	0.213059	0	1
Control 2-10mm	Adcy7	31.2637	0.0558408	9.85326
Control 3-10mm	Adcy7	31.205	0.298019	9.70373
Adcy7-1-2mm	Slc2a2	25.7911	0.0320992	3.99085	4.33704	0.0278956	-6.74539	107.291
Adcy7-2-2mm	Slc2a2	26.2386	0.0460434	4.5544
Adcy7-3-2mm	Slc2a2	26.1846	0.00554418	4.46586
Adcy7-1-10mm	Slc2a2	25.6748	0.251105	4.17113	4.33637	0.319104	-6.7488	107.545
Adcy7-2-10mm	Slc2a2	25.7102	0.682646	4.20395
Adcy7-3-10mm	Slc2a2	26.1721	0.0235618	4.63402
Control 1-2mm	Slc2a2	32.3691	0.105878	10.6666	11.0824	0.101456	0	1
Control 2-2mm	Slc2a2	32.698	0.0604718	11.2301
Control 3-2mm	Slc2a2	32.8025	0.138018	11.3506
Control 1-10mm	Slc2a2	32.6137	0.0876005	11.124	11.0852	0.184648	0	1
Control 2-10mm	Slc2a2	32.352	0.00541763	10.9415
Control 3-10mm	Slc2a2	32.6912	0.460927	11.19
